# Supplementary material
Source: publisher figshare collection journal article supplement (https://karger.figshare.com/articles/dataset/_/4326440)
Supplement: Supplementary file 1 [file 1]

**Table 8. Known skin diseases in 405 patients with tattoo complications.**

| <b>Known skin diseases</b>             | <b>Number</b> | <b>%</b> |
|----------------------------------------|---------------|----------|
| Atopic dermatitis                      | 25            | 6        |
| Psoriasis, including PPP               | 18            | 4        |
| Dermatitis, other than atopic          | 10            | 3        |
| Sarcoidosis                            | 8             | 2        |
| Urticaria, not related to tattoos      | 7             | 1.7      |
| Viral infections (verruca vulgaris)    | 3             | 0.7      |
| Local immune disease/immunopathy       | 3             | 0.7      |
| Abnormality of keratinisation          | 2             | 0.5      |
| Basal-cell carcinoma/other malignancy* | 1             | 0.3      |
| Lichen planus                          | 1             | 0.3      |
| Bacterial infection                    | 1             | 0.3      |
| Herpes simplex                         | 1             | 0.3      |
| Fungal infection                       | 1             | 0.3      |
| No skin disease                        | 324           | 80       |

\* Not originating from the tattoo.
