# Supplementary material
Source: publisher figshare collection journal article supplement (https://karger.figshare.com/articles/dataset/_/4326440)
Supplement: Supplementary file 2 [file 1]

**Table 7. Debut of symptoms on the three most frequent clinical patterns.**

| <b>Clinical pattern</b>               | <b>Debut of symptoms</b> |               |          |
|---------------------------------------|--------------------------|---------------|----------|
|                                       |                          | <b>Number</b> | <b>%</b> |
| <b>Infections*</b><br>(59 tattoos)    | Instantaneously          | 0             | 0        |
|                                       | 1-7 days                 | 47            | 80       |
|                                       | 8-25 days                | 4             | 7        |
|                                       | 1-3 months               | 3             | 5        |
|                                       | >3-6 months              | 0             | 0        |
|                                       | >6-12 months             | 2             | 3        |
|                                       | >12-24 months            | 2             | 3        |
|                                       | >24-48 months            | 0             | 0        |
|                                       | > 48 months              | 0             | 0        |
|                                       | Unknown                  | 1             | 2        |
|                                       | <b>Debut of symptoms</b> |               |          |
| <b>Allergic**</b><br>(184 tattoos)    |                          | <b>Number</b> | <b>%</b> |
|                                       | Instantaneously          | 0             | 0        |
|                                       | 1-7 days                 | 9             | 5        |
|                                       | 8-25 days                | 69            | 38       |
|                                       | 1-3 months               | 32            | 17       |
|                                       | >3-6 months              | 27            | 14       |
|                                       | >6-12 months             | 19            | 10       |
|                                       | >12-24 months            | 9             | 5        |
|                                       | >24-48 months            | 10            | 5        |
|                                       | > 48 months              | 5             | 3        |
|                                       | Unknown                  | 3             | 2        |
|                                       | After laser              | 1             | 1        |
|                                       | <b>Debut of symptoms</b> |               |          |
|                                       |                          | <b>Number</b> | <b>%</b> |
| <b>Papulo-nodular</b><br>(66 tattoos) | Instantaneously          | 1             | 2        |
|                                       | 1-7 days                 | 2             | 3        |
|                                       | 8-25 days                | 11            | 17       |
|                                       | 1-3 months               | 6             | 9        |
|                                       | >3-6 months              | 6             | 9        |
|                                       | >6-12 months             | 4             | 6        |
|                                       | >12-24 months            | 7             | 10       |
|                                       | >24-48 months            | 15            | 23       |
|                                       | > 48 months              | 14            | 21       |

\* Infections include bacteria (local, regional, systemic) and virus (local).

\*\* Allergic reactions include plaque elevation, ulceration and excessive hyperkeratosis.
