# Supplementary material
Source: publisher figshare collection journal article supplement (https://karger.figshare.com/articles/dataset/_/4326440)
Supplement: Supplementary file 3 [file 1]

**Table 4. Tattoo by type in 493 tattoo complications.**

| <b>Tattoo by type</b>                                                                  | <b>Number of tattoos</b> | <b>%</b> |
|----------------------------------------------------------------------------------------|--------------------------|----------|
| Professional*                                                                          | 397                      | 81       |
| Amateur**                                                                              | 70                       | 14       |
| Cosmetic (permanent make-up)                                                           | 11                       | 2        |
| Henna***                                                                               | 9                        | 1.8      |
| Traumatic (accident, explosion, and iatrogenic hazard due to ion infusion in subcutis) | 3                        | 0.6      |
| Medical (radiation field markings)                                                     | 2                        | 0.4      |
| Unknown                                                                                | 1                        | 0.2      |

\* Tattoos performed in a tattoo parlour by professionals were defined as “professional”. 25 of these tattoos with reactions had been contracted outside of Denmark (6%).

\*\* Two patients had been tattooed against their will.

\*\*\* Henna tattoos had strong reactions with generalised rash or chronic dermatitis.
