# Supplementary material
Source: publisher figshare collection journal article supplement (https://karger.figshare.com/articles/dataset/_/4326440)
Supplement: Supplementary file 5 [file 1]

## **Supplementary data:**

**Tattoo by type** is shown in table 4. The majority were performed in a tattoo parlour by professional tattooists (81%).

**Anatomical sites** are shown in table 5. The most common sites were; forearm (26%), shoulder/upper arm (17%) and lower leg (16%).

### **Symptoms according to patient's history**

Tattoo complications are often accompanied or manifested with several symptoms, dominated by swelling (80%) and itching (65%), see table 6.

### **Debut of symptoms after tattooing**

Debut of symptoms concerning the three most frequent clinical patterns are shown in table 7. Infections debuted in the first week, allergic reactions within a few months and papulo-nodular reactions after a few or several months.

### **Known skin diseases and predispositions**

For overview of associated skin diseases, see table 8. In general, 324/405 (80%) had *no* known skin disease. Köbner phenomenon, i.e. aggravation of skin diseases in particular psoriasis following physical trauma was observed in one patient.

**Known allergies** are displayed in table 9. The majority (62%) had no reported past allergies.
