# Supplementary material
Source: publisher figshare collection journal article supplement (https://karger.figshare.com/articles/dataset/_/4326440)
Supplement: Supplementary file 6 [file 1]

**Table 6. Symptoms of 493 tattoo complications according to patient history. \***

| <b>Symptoms according to patient's history</b> | <b>Number</b> | <b>%</b> |
|------------------------------------------------|---------------|----------|
| Swelling                                       | 394           | 80       |
| Itch                                           | 321           | 65       |
| Pain                                           | 148           | 30       |
| Scaling                                        | 117           | 24       |
| Redness                                        | 98            | 20       |
| Wounds                                         | 94            | 19       |
| Photosensitivity                               | 82            | 17       |
| Scar tissue                                    | 33            | 7        |
| Thermal/alcohol/hash, mechanic deterioration   | 11            | 2        |

\* One tattoo may show two or more symptoms.
