# Supplementary material
Source: publisher figshare collection journal article supplement (https://karger.figshare.com/articles/dataset/_/4326440)
Supplement: Supplementary file 7 [file 1]

**Table 5. Anatomical sites, predilections of 493 tattoo complications.**

| <b>Anatomical sites</b>          | <b>Number</b> | <b>%</b> |
|----------------------------------|---------------|----------|
| Forearm                          | 129           | 26       |
| Shoulders/Upper arm              | 84            | 17       |
| Lower leg                        | 78            | 16       |
| Wrist/hand                       | 40            | 8        |
| Foot, ankle                      | 30            | 6        |
| Trunk, posterior                 | 20            | 4        |
| Thigh incl. buttock, hips, knees | 15            | 3        |
| Trunk, anterior                  | 14            | 3        |
| Neck                             | 11            | 2        |
| Sacral region                    | 9             | 2        |
| Eyebrows/eyelids                 | 8             | 2        |
| Other facial regions             | 8             | 2        |
| Flank                            | 6             | 1.2      |
| Abdomen incl. groin              | 4             | 0.8      |
| Lips                             | 3             | 0.6      |
| Genitals                         | 1             | 0.2      |
| Multiple locations               | 33            | 7        |
