# Supplementary material
Source: publisher figshare collection journal article supplement (https://karger.figshare.com/articles/dataset/_/4326440)
Supplement: Supplementary file 8 [file 1]

Archive with 8 entries (8 files):
- 452148sm_8.pdf
- 452148sm_1.pdf
- 452148sm_2.pdf
- 452148sm_3.pdf
- 452148sm_4.pdf
- 452148sm_5.pdf
- 452148sm_6.pdf
- 452148sm_7.pdf
