# Supplementary material
Source: publisher figshare collection journal article supplement (https://karger.figshare.com/articles/dataset/_/4326440)
Supplement: Supplementary file 8 [file 1 › 452148sm_8.pdf]

**Table 9. Known allergies in 405 patients with tattoo complications.**

| <b>Known allergies by history</b>                                    | <b>Number</b> | <b>%</b> |
|----------------------------------------------------------------------|---------------|----------|
| Food, pollen, parabens, animals, fungi, dust, perfume, silicone etc. | 76            | 19       |
| Metals (e.g. nickel, cobalt)                                         | 73            | 18       |
| Medicines                                                            | 21            | 6        |
| Airway allergens                                                     | 14            | 4        |
| Tattoo ink/ink ingredients of any kind                               | 9             | 2        |
| Preservatives*                                                       | 7             | 2        |
| PPD*                                                                 | 6             | 2        |
| Rubber chemicals/latex*                                              | 2             | 0.5      |
| No reported allergy                                                  | 251           | 62       |

\*Some patients had been patch tested previously. Several patients reported allergies to *more* than one substance.
